# Supplementary material
Source: PubMed Central journal article supplement (PMC6109913)
Supplement: supp_RA118.002428_136026_1_supp_163095_pbjjtl.pdf [file supp_RA118.002428_136026_1_supp_163095_pbjjtl.pdf]

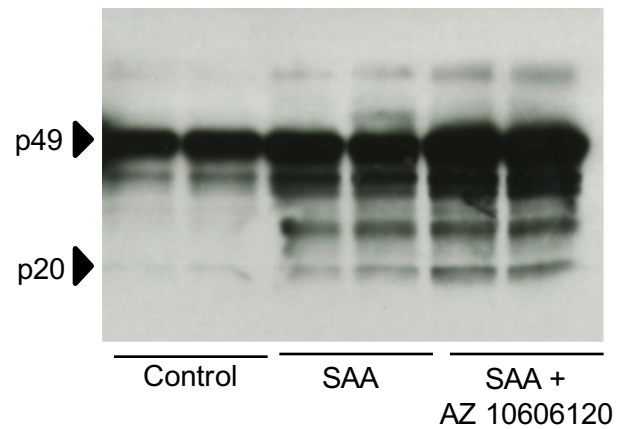

**Figure S1.** J774 cells were incubated  $\pm 5$   $\mu\text{g/ml}$  mouse SAA in the presence or absence of 10  $\mu\text{M}$  P2X7R-specific antagonist AZ10606120 for 24 h and activation of caspase-1 was determined by immunoblot analysis. The migration of procaspase-1 (p49) and the active caspase-1 (p20) cleavage product is indicated.
